# Supplementary material for: A bespoke microfluidic pharmacokinetic compartment model for drug absorption using artificial cell membranes
Source: Royal Society of Chemistry journal article supplement (doi:10.1039/d0lc00263a), 2020-01-01
Supplement: d0lc00263a1.zip [file d0lc00263a1.zip]

Archive with 3 entries (3 files):
- device in operation.mp4
- electronic supplementary information.pdf
- mask design.dxf
